# Supplementary material for: Exploring the efficacy and beneficial population of preimplantation genetic testing for aneuploidy start from the oocyte retrieval cycle: a real-world study
Source: Springer Nature journal article supplement (doi:10.1186/s12967-023-04641-2), 2023-11-02

Figure S1

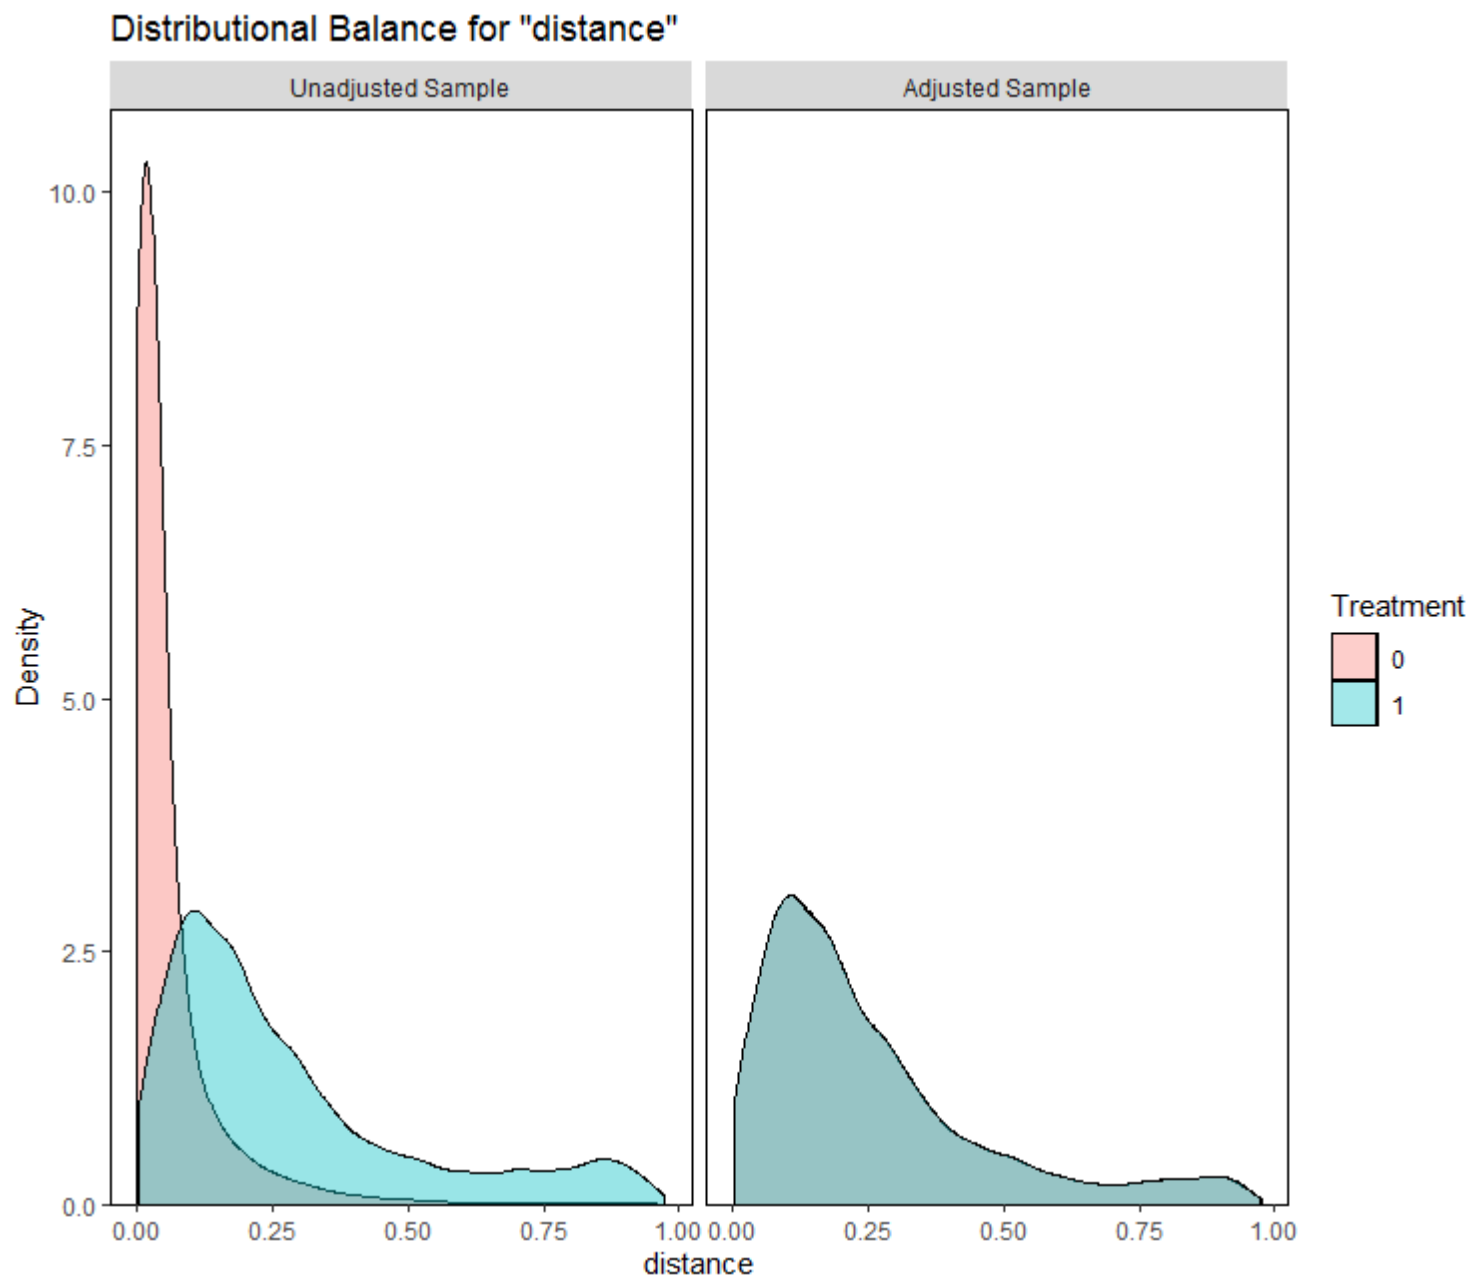

Figure S2

|                                        | <b>PGT-A</b>        | <b>Non-PGT-A</b>      | <b>OR (95%CI)</b> |
|----------------------------------------|---------------------|-----------------------|-------------------|
| <b>Clinical pregnancy rate (first)</b> |                     |                       |                   |
| PSM                                    | 63.9% (1,178/1,844) | 46.9% (3,437/7,334)   | 2.01 (1.81-2.23)  |
| PS stratification                      | 63.7% (1,235/1,940) | 64.5% (30,768/47,729) | 2.10 (1.91-2.31)  |
| Traditional logistic regression        | 63.7% (1,235/1,940) | 64.5% (31,109/48,213) | 1.49 (1.34-1.66)  |
| <b>Early miscarriage rate (first)</b>  |                     |                       |                   |
| PSM                                    | 12.8% (151/1,178)   | 20.2% (694/3,437)     | 0.58 (0.48-0.70)  |
| PS stratification                      | 13.1% (162/1,235)   | 10.4% (3,188/30,768)  | 0.64 (0.54-0.75)  |
| Traditional logistic regression        | 13.1% (162/1,235)   | 10.3% (3,215/31,109)  | 0.70 (0.58-0.84)  |
| <b>Live birth rate (first)</b>         |                     |                       |                   |
| PSM                                    | 52.6% (970/1,844)   | 34.2% (2,511/7,334)   | 2.13 (1.92-2.36)  |
| PS stratification                      | 52.2% (1,013/1,940) | 54.0% (25,752/47,729) | 2.14 (1.95-2.35)  |
| Traditional logistic regression        | 52.2% (1,013/1,940) | 54.0% (26,042/48,213) | 1.52 (1.37-1.68)  |
| <b>Cumulative live birth rate</b>      |                     |                       |                   |
| PSM                                    | 27.5% (1,155/4,195) | 31.1% (3,150/10,140)  | 0.84 (0.78-0.91)  |
| PS stratification                      | 27.3% (1,203/4,409) | 57.0% (31,705/55,635) | 0.88 (0.83-0.95)  |
| Traditional logistic regression        | 27.3% (1,203/4,409) | 57.0% (32,044/56,171) | 0.64 (0.59-0.70)  |

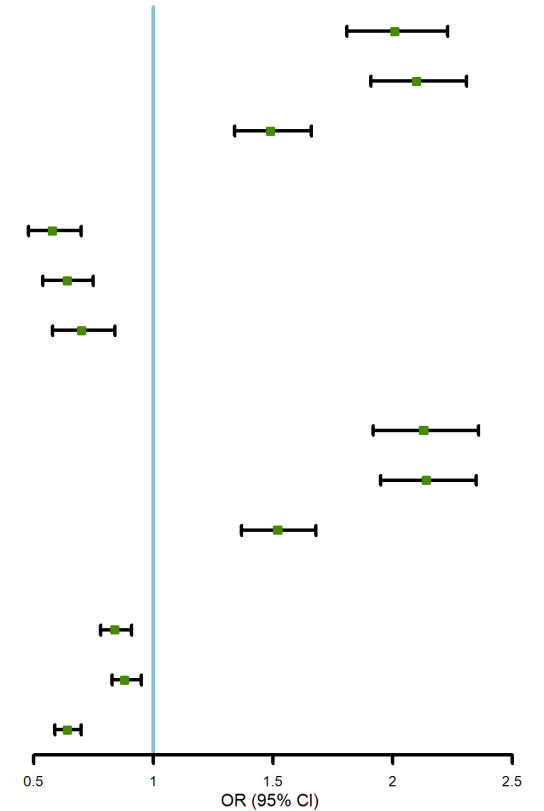

Figure S3

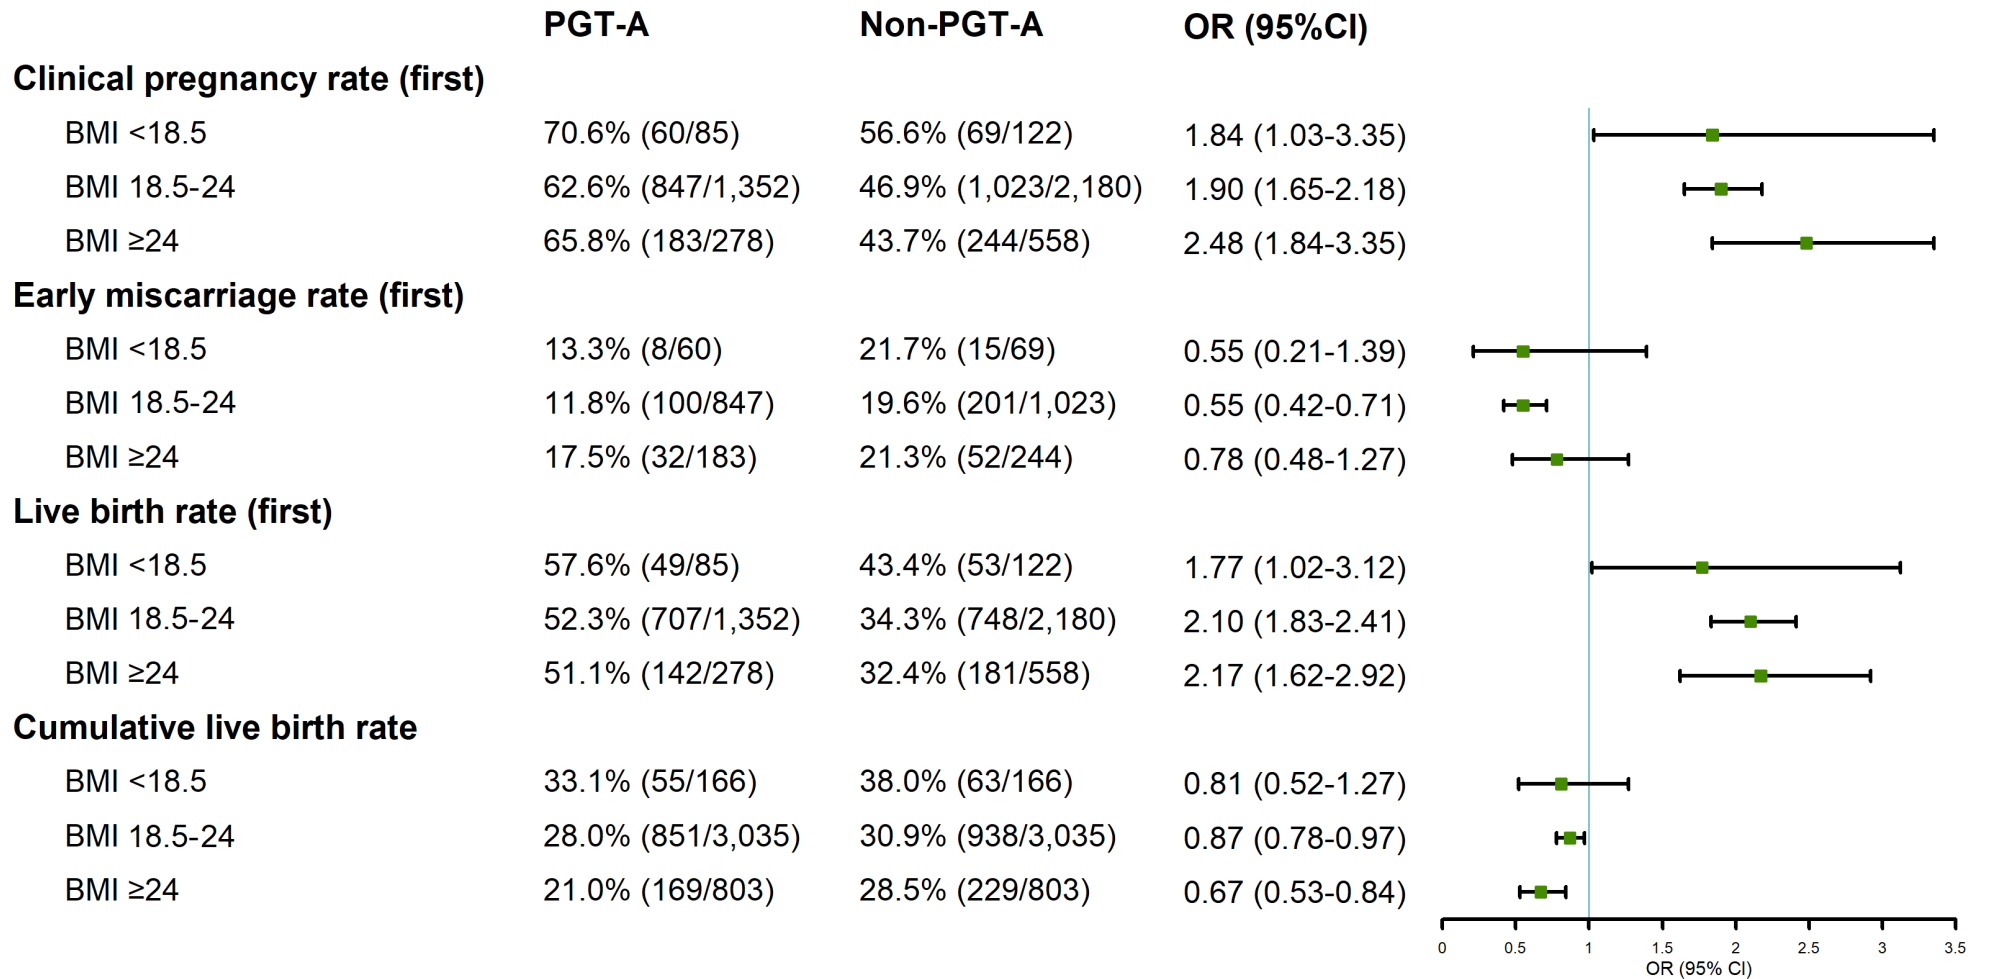

Figure S4

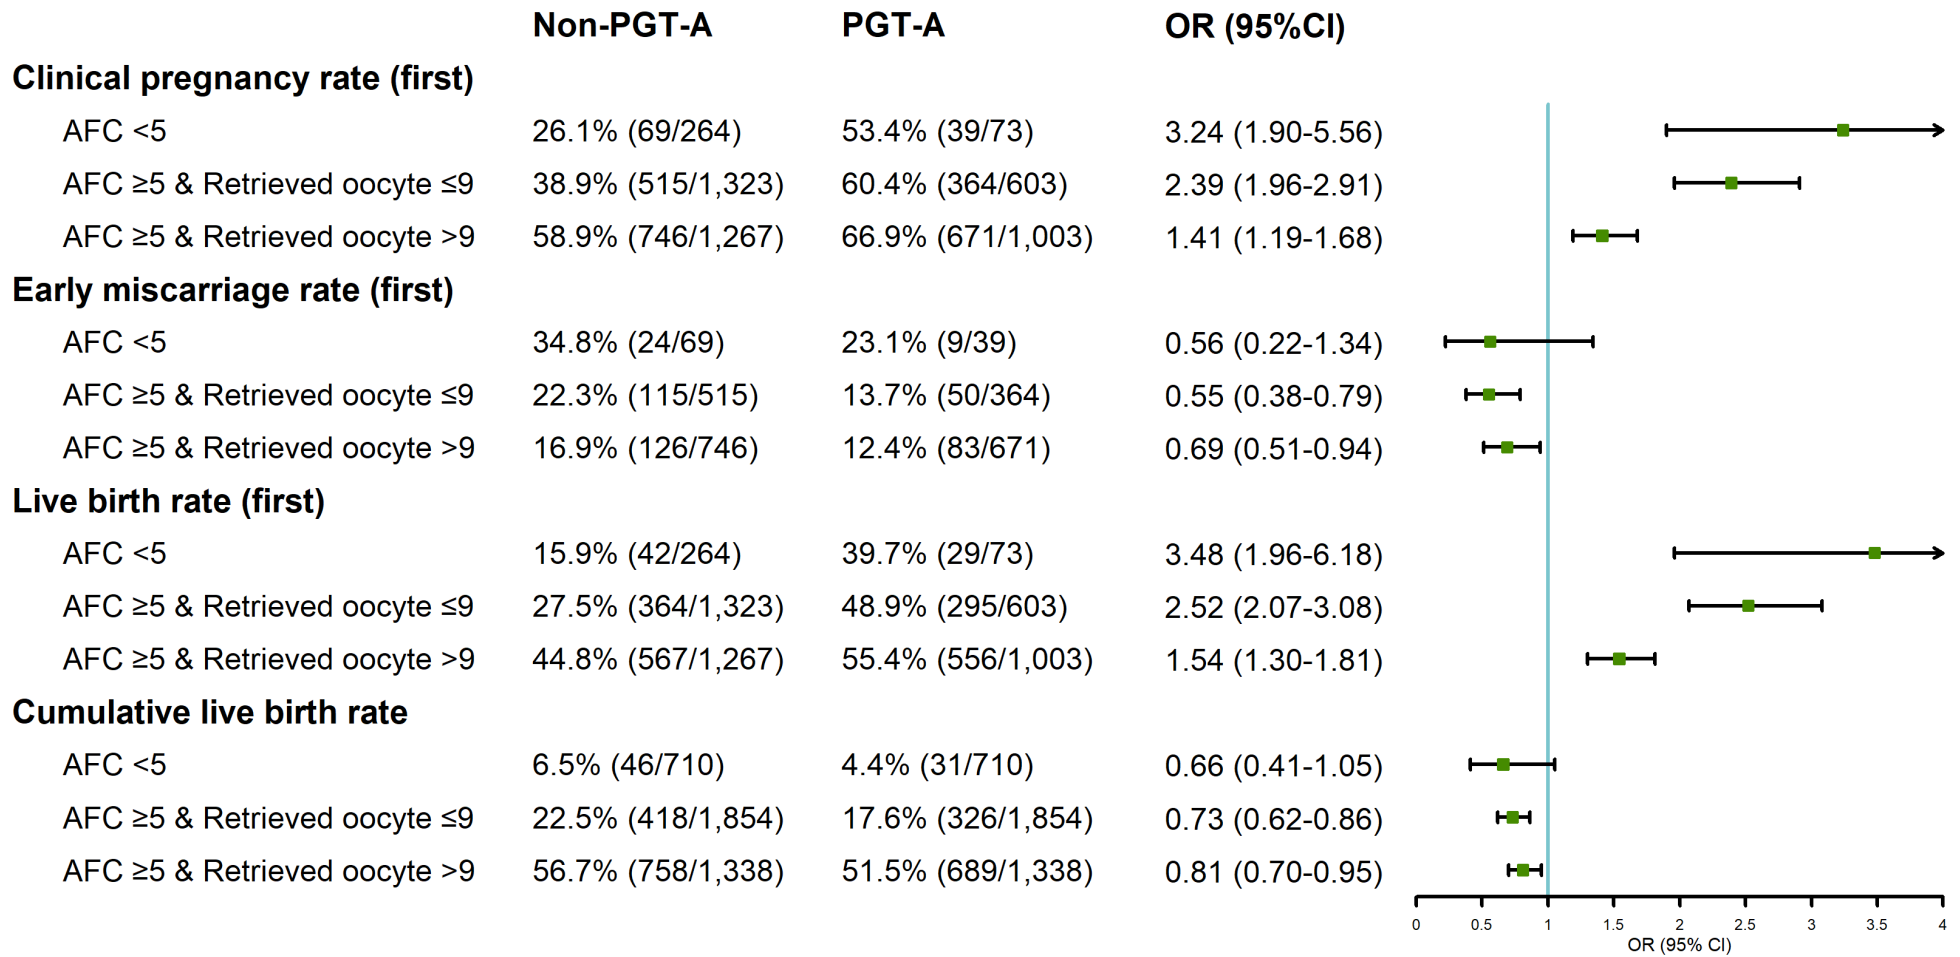

Figure S5

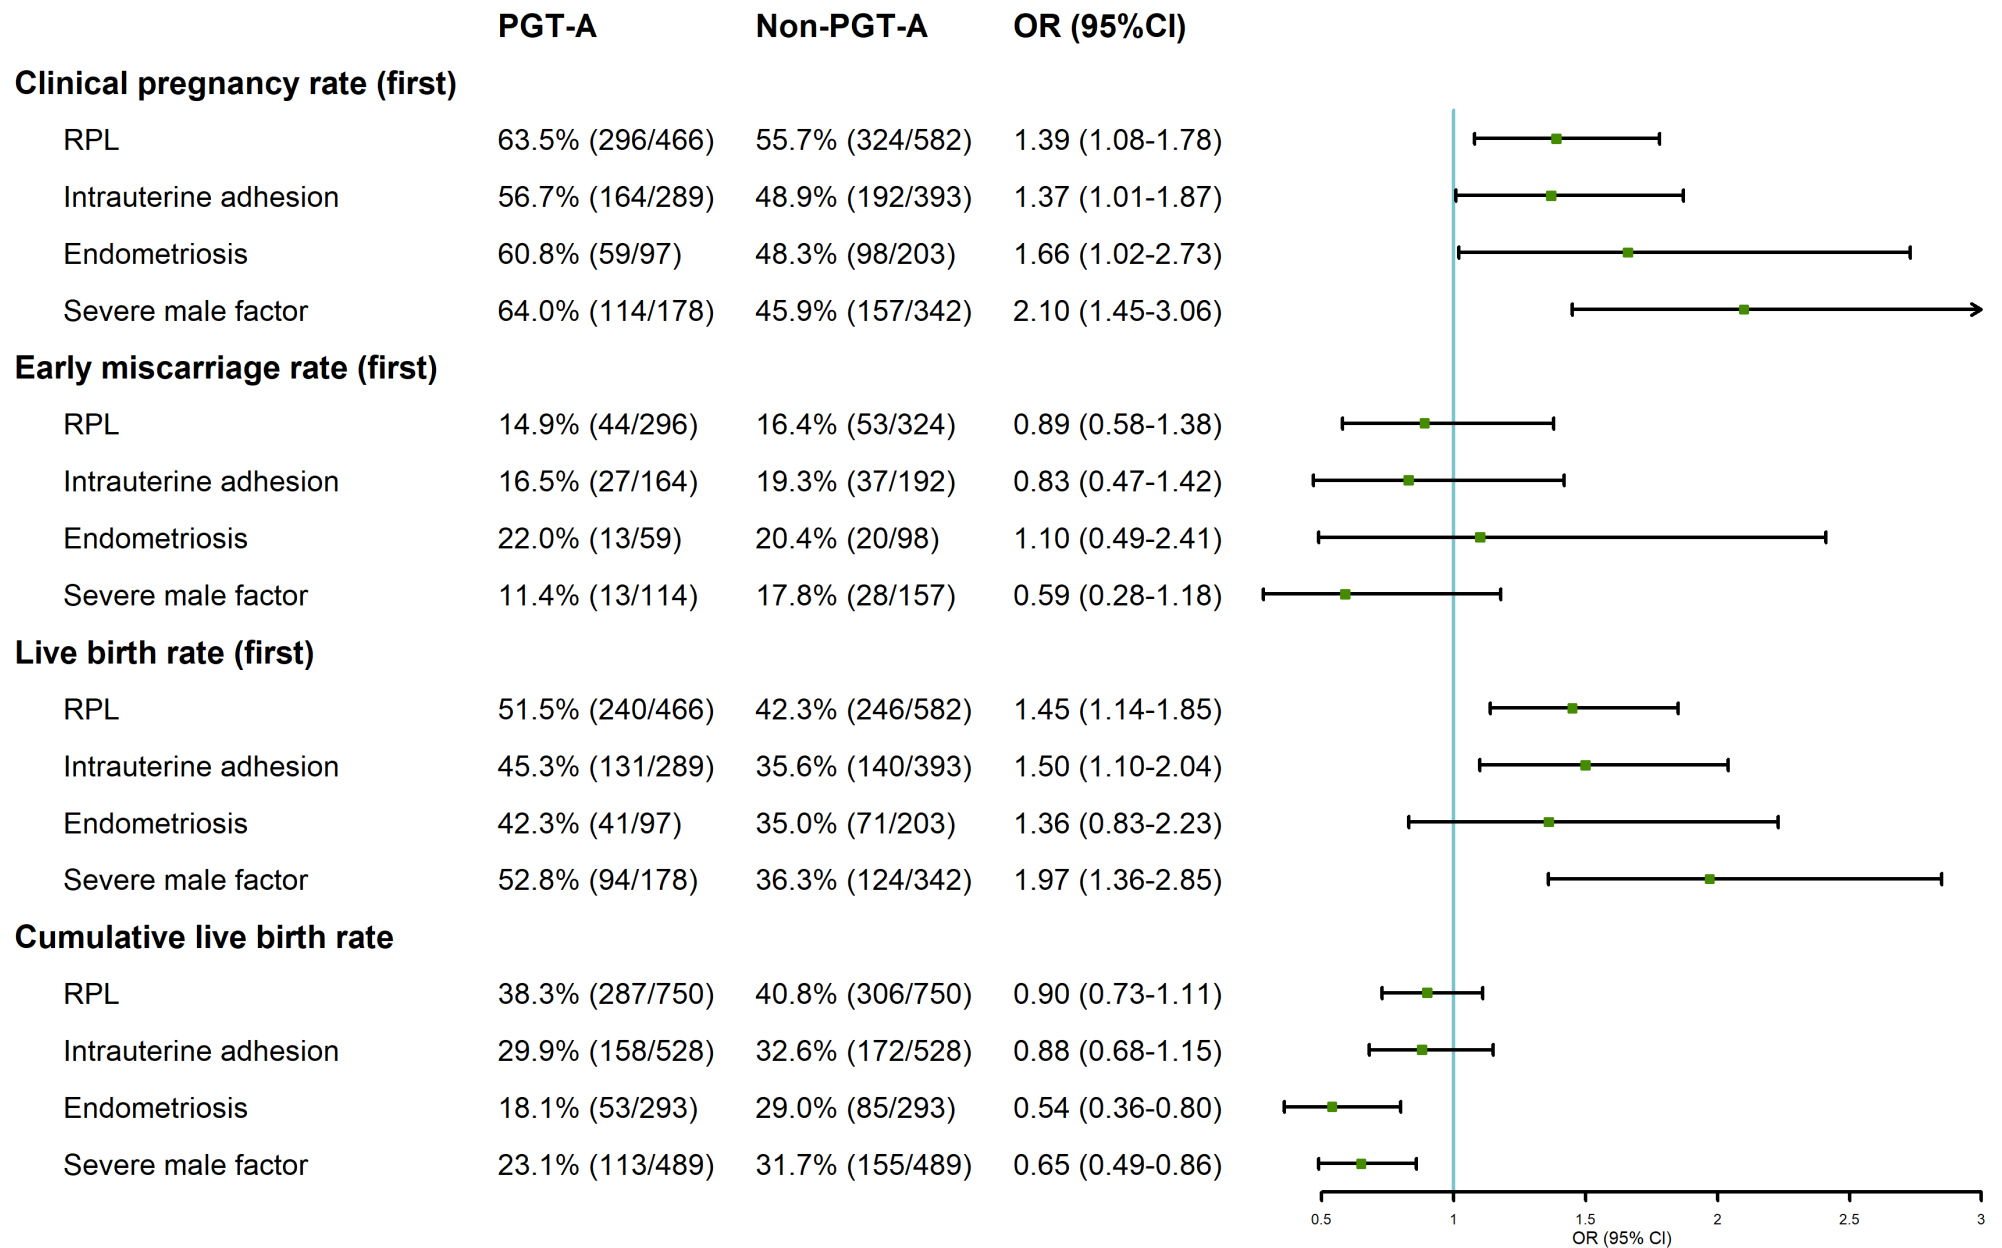

Supplement: MOESM1 [file 26256164]
