# Supplementary material for: Exploring the efficacy and beneficial population of preimplantation genetic testing for aneuploidy start from the oocyte retrieval cycle: a real-world study
Source: Springer Nature journal article supplement (doi:10.1186/s12967-023-04641-2), 2023-11-02
Supplement: MOESM2 [file 26256164]

**Table S1. Female age-stratified outcomes of the first and cumulative transplant between PGT-A and non-PGT-A patients.**

|                                                  | Age<35y         |                 |         | Age 35-38y      |                 |         | Age 38-41y        |                   |         | Age 41-43y      |                 |         | Age≥43y         |                 |         |
|--------------------------------------------------|-----------------|-----------------|---------|-----------------|-----------------|---------|-------------------|-------------------|---------|-----------------|-----------------|---------|-----------------|-----------------|---------|
|                                                  | PGT-A           | Non-PGT-A       | P value | PGT-A           | Non-PGT-A       | P value | PGT-A             | Non-PGT-A         | P value | PGT-A           | Non-PGT-A       | P value | PGT-A           | Non-PGT-A       | P value |
| <b>Number of oocyte retrieval cycles</b>         | 817             | 817             |         | 672             | 672             |         | 1,025             | 1,025             |         | 612             | 612             |         | 755             | 755             |         |
| <b>Number of first transfer cycles</b>           | 657             | 720             |         | 419             | 558             |         | 441               | 783               |         | 128             | 391             |         | 41              | 369             |         |
| Single embryo transfer                           | 98.9% (650/657) | 19.9% (143/720) | <0.001  | 98.8% (414/419) | 22.2% (124/558) | <0.001  | 98.6% (435/441)   | 20.9% (164/783)   | <0.001  | 100% (128/128)  | 23.0% (90/391)  | <0.001  | 100% (41/41)    | 25.7% (95/369)  | <0.001  |
| Live birth rate                                  | 54.3% (357/657) | 54.7% (394/720) | 0.886   | 51.6% (216/419) | 47.0% (262/558) | 0.155   | 50.1% (221/441)   | 27.5% (215/783)   | <0.001  | 53.9% (69/128)  | 14.8% (58/391)  | <0.001  | 46.3% (19/41)   | 5.1% (19/369)   | <0.001  |
| Singleton                                        | 53.3% (350/657) | 38.6% (278/720) | <0.001  | 51.3% (215/419) | 34.4% (192/558) | <0.001  | 49.7% (219/441)   | 24.8% (194/783)   | <0.001  | 53.9% (69/128)  | 13.6% (53/391)  | <0.001  | 43.9% (18/41)   | 4.9% (18/369)   | <0.001  |
| Multiple                                         | 1.1% (7/657)    | 16.1% (116/720) | <0.001  | 0.2% (1/419)    | 12.5% (70/558)  | <0.001  | 0.5% (2/441)      | 2.7% (21/783)     | 0.006   | 0% (0/128)      | 1.3% (5/391)    | 0.31    | 2.4% (1/41)     | 0.3% (1/369)    | 0.119   |
| Clinical pregnancy rate                          | 65.0% (427/657) | 67.1% (483/720) | 0.413   | 62.8% (263/419) | 60.2% (336/558) | 0.417   | 61.5% (271/441)   | 44.8% (351/783)   | <0.001  | 66.4% (85/128)  | 27.4% (107/391) | <0.001  | 63.4% (26/41)   | 13.6% (50/369)  | <0.001  |
| Singleton                                        | 62.9% (413/657) | 44.6% (321/720) | <0.001  | 61.6% (258/419) | 42.8% (239/558) | <0.001  | 60.5% (267/441)   | 38.1% (298/783)   | <0.001  | 65.6% (84/128)  | 23.8% (93/391)  | <0.001  | 61.0% (25/41)   | 12.7% (47/369)  | <0.001  |
| Multiple                                         | 2.1% (14/657)   | 22.5% (162/720) | <0.001  | 1.2% (5/419)    | 17.4% (97/558)  | <0.001  | 0.9% (4/441)      | 6.8% (53/783)     | <0.001  | 0.8% (1/128)    | 3.6% (14/391)   | 0.136   | 2.4% (1/41)     | 0.8% (3/369)    | 0.339   |
| Pregnancy loss rate                              | 16.4% (70/427)  | 18.4% (89/483)  | 0.42    | 17.9% (47/263)  | 22.0% (74/336)  | 0.21    | 18.5% (50/271)    | 38.7% (136/351)   | <0.001  | 18.8% (16/85)   | 45.8% (49/107)  | <0.001  | 26.9% (7/26)    | 62.0% (31/50)   | 0.004   |
| Ectopic pregnancy                                | 0.9% (4/427)    | 3.1% (15/483)   | 0.022   | 0.8% (2/263)    | 1.2% (4/336)    | 0.603   | 1.5% (4/271)      | 2.3% (8/351)      | 0.474   | 0% (0/85)       | 2.8% (3/107)    | 0.102   | 0% (0/26)       | 0% (0/50)       | -       |
| Early miscarriage                                | 13.1% (56/427)  | 11.2% (54/483)  | 0.372   | 13.7% (36/263)  | 15.8% (53/336)  | 0.477   | 11.8% (32/271)    | 31.1% (109/351)   | <0.001  | 11.8% (10/85)   | 42.1% (45/107)  | <0.001  | 19.2% (5/26)    | 62.0% (31/50)   | <0.001  |
| Late miscarriage                                 | 2.3% (10/427)   | 4.1% (20/483)   | 0.134   | 3.8% (10/263)   | 5.4% (18/336)   | 0.373   | 5.2% (14/271)     | 5.4% (19/351)     | 0.892   | 7.1% (6/85)     | 1.9% (2/107)    | 0.096   | 7.7% (2/26)     | 0% (0/50)       | 0.11    |
| Pregnancy complications                          | 30.7% (131/427) | 37.3% (180/483) | 0.037   | 33.8% (89/263)  | 34.8% (117/336) | 0.802   | 35.1% (95/271)    | 23.6% (83/351)    | 0.002   | 41.2% (35/85)   | 23.4% (25/107)  | 0.008   | 23.1% (6/26)    | 18.0% (9/50)    | 0.599   |
| Gestational hypertension rate                    | 2.8% (12/427)   | 4.6% (22/483)   | 0.17    | 4.9% (13/263)   | 2.7% (9/336)    | 0.15    | 4.8% (13/271)     | 1.4% (5/351)      | 0.019   | 7.1% (6/85)     | 2.8% (3/107)    | 0.18    | 3.8% (1/26)     | 4.0% (2/50)     | 0.974   |
| Gestational diabetes rate                        | 16.4% (70/427)  | 15.9% (77/483)  | 0.854   | 15.6% (41/263)  | 16.4% (55/336)  | 0.796   | 18.5% (50/271)    | 11.4% (40/351)    | 0.013   | 20.0% (17/85)   | 9.3% (10/107)   | 0.035   | 19.2% (5/26)    | 6.0% (3/50)     | 0.09    |
| Preterm birth rate                               | 9.8% (35/357)   | 20.9% (82/393)  | <0.001  | 7.4% (16/216)   | 20.6% (54/262)  | <0.001  | 8.6% (19/221)     | 13.5% (29/215)    | 0.105   | 7.2% (5/69)     | 10.3% (6/58)    | 0.538   | 26.3% (5/19)    | 21.1% (4/19)    | 0.903   |
| Singleton                                        | 9.1% (32/350)   | 6.5% (18/277)   | 0.227   | 7.0% (15/215)   | 11.5% (22/192)  | 0.12    | 8.2% (18/219)     | 10.3% (20/194)    | 0.464   | 7.2% (5/69)     | 7.5% (4/53)     | 0.95    | 22.2% (4/18)    | 16.7% (3/18)    | 0.675   |
| Multiple                                         | 42.9% (3/7)     | 55.2% (64/116)  | 0.529   | 100% (1/1)      | 45.7% (32/70)   | 0.991   | 50.0% (1/2)       | 42.9% (9/21)      | 0.846   | -               | 40.0% (2/5)     | -       | 100% (1/1)      | 100% (1/1)      | 0.967   |
| Low birth weight rate                            | 7.8% (28/361)   | 25.2% (128/508) | <0.001  | 2.8% (6/216)    | 19.0% (63/332)  | <0.001  | 3.2% (7/218)      | 10.7% (25/233)    | 0.002   | 4.3% (3/69)     | 9.8% (6/61)     | 0.231   | 20.0% (4/20)    | 25.0% (5/20)    | 0.705   |
| Singleton                                        | 6.3% (22/347)   | 4.7% (13/276)   | 0.382   | 2.3% (5/214)    | 4.7% (9/190)    | 0.197   | 2.8% (6/214)      | 4.2% (8/191)      | 0.449   | 4.3% (3/69)     | 3.9% (2/51)     | 0.908   | 11.1% (2/18)    | 16.7% (3/18)    | 0.632   |
| Multiple                                         | 42.9% (6/14)    | 49.6% (115/232) | 0.627   | 50.0% (1/2)     | 38.0% (54/142)  | 0.732   | 25.0% (1/4)       | 40.5% (17/42)     | 0.551   | -               | 40.0% (4/10)    | -       | 100% (2/2)      | 100% (2/2)      | 0.963   |
| Neonatal malformation cycle rate                 | 0.6% (2/357)    | 2.3% (9/394)    | 0.05    | 1.4% (3/216)    | 2.3% (6/262)    | 0.475   | 0.5% (1/221)      | 2.3% (5/215)      | 0.132   | 0% (0/69)       | 3.4% (2/58)     | 0.2     | 5.3% (1/19)     | 0% (0/19)       | 0.927   |
| <b>Cumulative number of transfer cycles</b>      | 842             | 963             |         | 532             | 728             |         | 511               | 1,017             |         | 141             | 493             |         | 42              | 425             |         |
| Cumulative number of newborns                    | 454             | 624             |         | 273             | 415             |         | 257               | 306               |         | 73              | 89              |         | 20              | 25              |         |
| Cumulative live birth rate <sup>a</sup>          | 54.2% (443/817) | 58.5% (478/817) | 0.081   | 39.9% (268/672) | 49.3% (331/672) | <0.001  | 24.9% (255/1,025) | 27.1% (278/1,025) | 0.247   | 11.9% (73/612)  | 13.4% (82/612)  | 0.439   | 2.5% (19/755)   | 3.2% (24/755)   | 0.44    |
| Singleton                                        | 53.2% (435/817) | 41.5% (339/817) | <0.001  | 39.4% (265/672) | 37.4% (251/672) | 0.432   | 24.7% (253/1,025) | 24.5% (251/1,025) | 0.918   | 11.9% (73/612)  | 12.4% (76/612)  | 0.8793  | 2.4% (18/755)   | 3.0% (23/755)   | 0.43    |
| Multiple                                         | 1.0% (8/817)    | 17.0% (139/817) | <0.001  | 0.4% (3/672)    | 11.9% (80/672)  | <0.001  | 0.2% (2/1,025)    | 2.6% (27/1,025)   | <0.001  | 0% (0/612)      | 1.0% (6/612)    | 0.031   | 0.1% (1/755)    | 0.1% (1/755)    | 0.997   |
| Interval since oocyte retrieved, days            | 408 (355-485)   | 265 (253-358)   | <0.001  | 394 (345-485)   | 264 (253-352)   | <0.001  | 378 (345-450)     | 266 (255-349)     | <0.001  | 381 (339-441)   | 266 (255-366)   | <0.001  | 338 (316-374)   | 264 (257-352)   | 0.007   |
| <b>Number of cycles not reached live birth</b>   | 374             | 339             | 0.214   | 404             | 341             |         | 770               | 747               |         | 539             | 530             |         | 736             | 731             |         |
| Oocyte unretrieved cycle rate                    | 0.1% (1/817)    | 0.2% (2/817)    | 0.571   | 1.9% (13/672)   | 2.5% (17/672)   | 0.461   | 5.9% (60/1,025)   | 4.7% (48/1,025)   | 0.236   | 8.3% (51/612)   | 9.3% (57/612)   | 0.546   | 14.7% (111/755) | 14.4% (109/755) | 0.88    |
| No transferable embryo cycle rate <sup>b</sup>   | 11.0% (90/817)  | 8.0% (65/817)   | 0.035   | 24.4% (164/672) | 12.4% (83/672)  | <0.001  | 45.0% (461/1,025) | 18.0% (185/1,025) | <0.001  | 66.2% (405/612) | 29.7% (182/612) | <0.001  | 73.6% (556/755) | 43.0% (325/755) | <0.001  |
| With transferable embryo cycle rate <sup>c</sup> | 20.7% (169/817) | 19.1% (156/817) | 0.421   | 16.4% (110/672) | 16.1% (108/672) | 0.882   | 8.6% (88/1,025)   | 19.2% (197/1,025) | <0.001  | 3.4% (21/612)   | 18.0% (110/612) | <0.001  | 0.9% (7/755)    | 16.0% (121/755) | <0.001  |

Notes: All ages were rounded down, the "left close, right open" rule of thumb was applied uniformly for stratification variables.

<sup>a</sup>, twice or more live births under the same oocyte retrieval cycle are counted as one when the cumulative live birth rate is calculated. The numbers of twice live births in the PGT-A group and non-PGT-A group were 3 and 7 for women aged <35 years, 2 and 2 for women aged 35-38 years, 0 and 1 for women aged 38-41 years, 0 and 1 for women aged 41-43 years, 0 and 0 for women aged ≥43 years, respectively;

<sup>b</sup>, the proportions of abnormal embryos (including chimeras) detected in the PGT-A group of 5 age strata were 8.1% (66/817), 16.7% (112/672), 28.0% (287/1,025), 37.3% (228/612), 26.1% (197/755), respectively;

<sup>c</sup>, the undetected transferable embryos were included in the PGT-A group;

Abbreviations: CI, confidence interval; Non-PGT-A, not use preimplantation genetic testing for aneuploidy; OR, odds ratio; PGT-A, preimplantation genetic testing for aneuploidy.

**Table S2. Stratified analyses of the first and cumulative transplant between PGT-A and non-PGT-A group by the presence or absence of RPL in women aged <35 years .**

|                                                  | Age<35 without RPL |                 |         | Age<35 with RPL |                 |         |
|--------------------------------------------------|--------------------|-----------------|---------|-----------------|-----------------|---------|
|                                                  | PGT-A              | Non-PGT-A       | P value | PGT-A           | Non-PGT-A       | P value |
| <b>Number of oocyte retrieval cycles</b>         | 320                | 320             |         | 387             | 387             |         |
| <b>Number of first transfer cycles</b>           | 255                | 299             |         | 301             | 333             |         |
| Single embryo transfer                           | 98% (249/255)      | 16% (47/299)    | <0.001  | 100% (309/310)  | 27% (89/333)    | <0.001  |
| Live birth rate                                  | 55.3% (141/255)    | 57.9% (173/299) | 0.544   | 56.8% (176/310) | 47.1% (157/333) | 0.015   |
| Singleton                                        | 54% (138/255)      | 39% (116/299)   | <0.001  | 56% (174/310)   | 38% (125/333)   | <0.001  |
| Multiple                                         | 1% (3/255)         | 19% (57/299)    | <0.001  | 1% (2/310)      | 10% (32/333)    | <0.001  |
| Clinical pregnancy rate                          | 67.1% (171/255)    | 69.2% (207/299) | 0.584   | 65.2% (202/310) | 61.3% (204/333) | 0.306   |
| Singleton                                        | 65% (165/255)      | 43% (130/299)   | <0.001  | 63% (196/310)   | 44% (146/333)   | <0.001  |
| Multiple                                         | 2% (6/255)         | 26% (77/299)    | <0.001  | 2% (6/310)      | 17% (58/333)    | <0.001  |
| Pregnancy loss rate                              | 18% (30/171)       | 16% (34/207)    | 0.773   | 13% (26/202)    | 23% (47/204)    | 0.008   |
| Ectopic pregnancy                                | 2% (3/171)         | 4% (8/207)      | 0.236   | 0% (1/202)      | 3% (7/204)      | 0.067   |
| Early miscarriage                                | 14.0% (24/171)     | 9.2% (19/207)   | 0.141   | 10.4% (21/202)  | 13.7% (28/204)  | 0.305   |
| Late miscarriage                                 | 2% (3/171)         | 4% (9/207)      | 0.166   | 2% (4/202)      | 5% (11/204)     | 0.08    |
| Pregnancy complications                          | 32% (54/171)       | 31% (65/207)    | 0.97    | 29% (58/202)    | 37% (76/204)    | 0.068   |
| Gestational hypertension rate                    | 5% (9/171)         | 4% (9/207)      | 0.678   | 1% (2/202)      | 3% (7/204)      | 0.117   |
| Gestational diabetes rate                        | 16% (27/171)       | 16% (33/207)    | 0.968   | 15% (31/202)    | 15% (31/204)    | 0.966   |
| Preterm birth rate                               | 11% (15/141)       | 24% (41/173)    | 0.003   | 9% (15/176)     | 20% (32/157)    | 0.002   |
| Singleton                                        | 10% (14/138)       | 9% (10/116)     | 0.679   | 8% (14/174)     | 6% (8/125)      | 0.592   |
| Multiple                                         | 33% (1/3)          | 54% (31/57)     | 0.488   | 50% (1/2)       | 75% (24/32)     | 0.455   |
| Low birth weight rate                            | 9% (13/142)        | 27% (61/229)    | <0.001  | 5% (9/178)      | 22% (42/188)    | <0.001  |
| Singleton                                        | 9% (12/136)        | 4% (5/115)      | 0.168   | 4% (7/174)      | 6% (8/124)      | 0.3     |
| Multiple                                         | 17% (1/6)          | 49% (56/114)    | 0.157   | 50% (2/4)       | 53% (34/64)     | 0.903   |
| Neonatal malformation cycle rate                 | 1% (1/141)         | 2% (3/173)      | 0.436   | 1% (1/176)      | 1% (2/157)      | 0.508   |
| <b>Cumulative number of transfer cycles</b>      | 320                | 398             |         | 394             | 458             |         |
| Cumulative number of newborns                    | 183                | 291             |         | 211             | 243             |         |
| Cumulative live birth rate <sup>a</sup>          | 55.0% (176/320)    | 68.4% (219/320) | <0.001  | 54.0% (209/387) | 51.7% (200/387) | 0.517   |
| Singleton                                        | 54% (172/320)      | 48% (152/320)   | 0.11    | 53% (207/387)   | 41% (158/387)   | <0.001  |
| Multiple                                         | 1% (4/320)         | 21% (67/320)    | <0.001  | 1% (2/387)      | 11% (42/387)    | <0.001  |
| Interval since oocyte retrieved, days            | 388 (350-479)      | 263 (252-354)   | <0.001  | 404 (355-468)   | 272 (259-362)   | <0.001  |
| <b>Number of cycles not reached live birth</b>   | 144                | 101             |         | 178             | 187             |         |
| Oocyte unretrieved cycle rate                    | 0% (1/320)         | 1% (3/320)      | 0.6     | 0% (0/387)      | 0% (1/387)      | -       |
| No transferable embryo cycle rate <sup>b</sup>   | 10% (33/320)       | 5% (17/320)     | 0.018   | 11% (43/387)    | 10% (39/387)    | 0.705   |
| With transferable embryo cycle rate <sup>c</sup> | 21.9% (70/320)     | 9.1% (29/320)   | <0.001  | 20.9% (81/387)  | 22.2% (86/387)  | 0.657   |

Notes:

<sup>a</sup>, twice or more live births under the same oocyte retrieval cycle are counted as one when the cumulative live birth rate is calculated. The numbers of twice live births in the PGT-A group and non-PGT-A group were 3 and 5 for women aged <35 years without RSA, 0 and 1 for women aged <35 years with RSA, respectively;

<sup>b</sup>, the proportions of abnormal embryos (including chimeras) detected in the PGT-A group of 2 strata were 6.9% (22/320) and 8.5% (33/387), respectively;

<sup>c</sup>, the undetected transferable embryos were included in the PGT-A group;

Abbreviations: CI, confidence interval; Non-PGT-A, not use preimplantation genetic testing for aneuploidy; OR, odds ratio; PGT-A, preimplantation genetic testing for aneuploidy; RPL, recurrent pregnancy loss.

**Table S3. Female BMI-stratified outcomes of the first and cumulative transplant between PGT-A and non-PGT-A patients.**

|                                                  | BMI <18.5      |                |         | BMI 18.5-24         |                     |         | BMI ≥24         |                 |         |
|--------------------------------------------------|----------------|----------------|---------|---------------------|---------------------|---------|-----------------|-----------------|---------|
|                                                  | PGT-A          | Non-PGT-A      | P value | PGT-A               | Non-PGT-A           | P value | PGT-A           | Non-PGT-A       | P value |
| <b>Number of oocyte retrieval cycles</b>         | 166            | 166            |         | 3,035               | 3,035               |         | 803             | 803             |         |
| <b>Number of first transfer cycles</b>           | 85             | 122            |         | 1,352               | 2,180               |         | 278             | 558             |         |
| Single embryo transfer                           | 98.9% (84/85)  | 30.3% (37/122) | <0.001  | 99.0% (1,338/1,352) | 22.7% (495/2,180)   | <0.001  | 98.6% (274/278) | 22.6% (126/558) | <0.001  |
| Live birth rate                                  | 57.6% (49/85)  | 43.4% (53/122) | 0.044   | 52.3% (707/1,352)   | 34.3% (748/2,180)   | <0.001  | 51.1% (142/278) | 32.4% (181/558) | <0.001  |
| Singleton                                        | 56.5% (48/85)  | 31.1% (38/122) | <0.001  | 51.8% (701/1,352)   | 27.6% (601/2,180)   | <0.001  | 49.6% (138/278) | 26.2% (146/558) | <0.001  |
| Multiple                                         | 1.2% (1/85)    | 12.3% (15/122) | 0.003   | 0.4% (6/1,352)      | 6.7% (147/2,180)    | <0.001  | 1.4% (4/278)    | 6.3% (35/558)   | 0.002   |
| Clinical pregnancy rate                          | 70.6% (60/85)  | 56.6% (69/122) | 0.041   | 62.6% (847/1,352)   | 46.9% (1,023/2,180) | <0.001  | 65.8% (183/278) | 43.7% (244/558) | <0.001  |
| Singleton                                        | 69.4% (59/85)  | 37.7% (46/122) | <0.001  | 61.5% (831/1,352)   | 35.4% (771/2,180)   | <0.001  | 63.3% (176/278) | 33.5% (187/558) | <0.001  |
| Multiple                                         | 1.2% (1/85)    | 18.9% (23/122) | <0.001  | 1.2% (16/1,352)     | 11.6% (252/2,180)   | <0.001  | 2.5% (7/278)    | 10.2% (57/558)  | <0.001  |
| Pregnancy loss rate                              | 18.3% (11/60)  | 23.2% (16/69)  | 0.5     | 16.5% (140/847)     | 26.9% (275/1,023)   | <0.001  | 22.4% (41/183)  | 25.8% (63/244)  | 0.416   |
| Ectopic pregnancy                                | 1.7% (1/60)    | 1.4% (1/69)    | 0.921   | 1.1% (9/847)        | 2.4% (25/1,023)     | 0.026   | 0% (0/183)      | 0.8% (2/244)    | 0.5     |
| Early miscarriage                                | 13.3% (8/60)   | 21.7% (15/69)  | 0.217   | 11.8% (100/847)     | 19.6% (201/1,023)   | <0.001  | 17.5% (32/183)  | 21.3% (52/244)  | 0.326   |
| Late miscarriage                                 | 3.3% (2/60)    | 0% (0/69)      | 0.21    | 3.7% (31/847)       | 4.8% (49/1,023)     | 0.231   | 4.9% (9/183)    | 3.7% (9/244)    | 0.533   |
| Pregnancy complications                          | 25.0% (15/60)  | 30.4% (21/69)  | 0.493   | 33.8% (286/847)     | 30.8% (315/1,023)   | 0.17    | 37.7% (69/183)  | 32.0% (78/244)  | 0.217   |
| Gestational hypertension rate                    | 3.3% (2/60)    | 1.4% (1/69)    | 0.491   | 3.3% (28/847)       | 2.4% (25/1,023)     | 0.265   | 8.7% (16/183)   | 6.1% (15/244)   | 0.309   |
| Gestational diabetes rate                        | 11.7% (7/60)   | 13.0% (9/69)   | 0.813   | 18.2% (154/847)     | 14.4% (147/1,023)   | 0.026   | 19.1% (35/183)  | 14.4% (37/244)  | 0.28    |
| Preterm birth rate                               | 4.1% (2/49)    | 15.1% (8/53)   | 0.095   | 8.2% (58/707)       | 17.3% (129/747)     | <0.001  | 12.0% (17/142)  | 23.2% (42/181)  | 0.011   |
| Singleton                                        | 4.2% (2/48)    | 5.3% (2/38)    | 0.911   | 8.0% (56/701)       | 7.7% (46/601)       | 0.823   | 9.4% (13/138)   | 12.3% (18/146)  | 0.433   |
| Multiple                                         | 0% (0/1)       | 40.0% (6/15)   | 0.997   | 33% (2/6)           | 57% (83/146)        | 0.272   | 100% (4/4)      | 68.6% (24/35)   | 0.3     |
| Low birth weight rate                            | 2.1% (1/48)    | 25.0% (17/68)  | <0.001  | 5.1% (36/708)       | 19.8% (175/886)     | <0.001  | 6.2% (9/145)    | 16.4% (35/213)  | 0.004   |
| Singleton                                        | 2% (1/46)      | 13% (5/38)     | 0.087   | 4.3% (30/696)       | 5.2% (31/595)       | 0.448   | 3.6% (5/137)    | 4.8% (7/145)    | 0.625   |
| Multiple                                         | 0% (0/2)       | 40.0% (12/30)  | 0.5     | 50.0% (6/12)        | 49.5% (144/291)     | 0.972   | 50.0% (4/8)     | 41.2% (28/68)   | 0.634   |
| Neonatal malformation cycle rate                 | 0% (0/49)      | 0% (0/53)      | -       | 0.7% (5/707)        | 1.7% (13/748)       | 0.075   | 2.8% (4/142)    | 2.2% (4/181)    | 0.728   |
| <b>Cumulative number of transfer cycles</b>      | 101            | 150            |         | 1,803               | 2,660               |         | 333             | 706             |         |
| Cumulative number of newborns                    | 56             | 78             |         | 866                 | 1,131               |         | 173             | 272             |         |
| Cumulative live birth rate <sup>a</sup>          | 33.1% (55/166) | 38.0% (63/166) | 0.359   | 28.0% (851/3,035)   | 30.9% (938/3,035)   | 0.014   | 21.0% (169/803) | 28.5% (229/803) | <0.001  |
| Singleton                                        | 32.5% (54/166) | 28.9% (48/166) | 0.476   | 27.7% (842/3,035)   | 24.8% (754/3,035)   | 0.01    | 20.5% (165/803) | 23.2% (186/803) | 0.205   |
| Multiple                                         | 0.6% (1/166)   | 9.0% (15/166)  | <0.001  | 0.3% (9/3,035)      | 6.1% (184/3,035)    | <0.001  | 0.5% (4/803)    | 5.4% (43/803)   | <0.001  |
| Interval since oocyte retrieved, days            | 391 (355-459)  | 261 (254-372)  | <0.001  | 395 (348-474)       | 264 (255-352)       | <0.001  | 393 (349-464)   | 262 (251-335)   | <0.001  |
| <b>Number of cycles not reached live birth</b>   | 111            | 103            |         | 2,184               | 2,097               |         | 634             | 574             |         |
| Oocyte unretrieved cycle rate                    | 7.2% (12/166)  | 3.6% (6/166)   | 0.154   | 5.3% (162/3,035)    | 6.5% (197/3,035)    | 0.057   | 9.2% (74/803)   | 8.0% (64/803)   | 0.374   |
| No transferable embryo cycle rate <sup>b</sup>   | 34.3% (57/166) | 24.1% (40/166) | 0.041   | 42.1% (1,278/3,035) | 22.6 (687/3,035)    | <0.001  | 51.3% (412/803) | 24.9% (200/803) | <0.001  |
| With transferable embryo cycle rate <sup>c</sup> | 13.9% (23/166) | 13.9% (23/166) | 0.988   | 10.0% (304/3,035)   | 18.0% (545/3,035)   | <0.001  | 8.5% (68/803)   | 15.4% (124/803) | <0.001  |

Notes:

<sup>a</sup>, twice or more live births under the same oocyte retrieval cycle are counted as one when the cumulative live birth rate is calculated. The numbers of twice live births in the PGT-A group and non-PGT-A group were 0 and 0 for BMI <18.5 strata, 6 and 8 for women BMI 18.5-23.9 strata, 0 and 0 for BMI over 24 strata, respectively;

<sup>b</sup>, the proportions of abnormal embryos (including chimeras) detected in the PGT-A group of 3 strata were 19.9% (33/166), 22.9% (696/3,035) and 25% (203/803), respectively;

<sup>c</sup>, the undetected transferable embryos were included in the PGT-A group;

Abbreviations: BMI, body mass index; CI, confidence interval; Non-PGT-A, not use preimplantation genetic testing for aneuploidy; OR, odds ratio; PGT-A, preimplantation genetic testing for aneuploidy.

**Table S4. Ovarian reserve and response-stratified outcomes of the first and cumulative transplant between PGT-A and non-PGT-**

|                                                  | AFC<5           |                 |         | AFC≥5 & Recovered oocyte ≤9 |                   |         | AFC≥5 & Recovered oocyte >9 |                   |         |
|--------------------------------------------------|-----------------|-----------------|---------|-----------------------------|-------------------|---------|-----------------------------|-------------------|---------|
|                                                  | PGT-A           | Non-PGT-A       | P value | PGT-A                       | Non-PGT-A         | P value | PGT-A                       | Non-PGT-A         | P value |
| <b>Number of oocyte retrieval cycles</b>         | 710             | 710             |         | 1,854                       | 1,854             |         | 1,338                       | 1,338             |         |
| <b>Number of first transfer cycles</b>           | 73              | 264             |         | 603                         | 1,323             |         | 1,003                       | 1,267             |         |
| Single embryo transfer                           | 100% (73/73)    | 41.7% (110/264) | <0.001  | 98.8% (596/603)             | 20.6% (273/1,323) | <0.001  | 98.8% (991/1,003)           | 18.7% (237/1,267) | <0.001  |
| Live birth rate                                  | 39.7% (29/73)   | 15.9% (42/264)  | <0.001  | 48.9% (295/603)             | 27.5% (364/1,323) | <0.001  | 55.4% (556/1,003)           | 44.8% (567/1,267) | <0.001  |
| Singleton                                        | 39.7% (29/73)   | 14.8% (39/264)  | <0.001  | 48.8% (294/603)             | 23.7% (314/1,323) | <0.001  | 54.4% (546/1,003)           | 33.5% (425/1,267) | <0.001  |
| Multiple                                         | 0% (0/73)       | 1.1% (3/264)    | 0.994   | 0.2% (1/603)                | 3.8% (50/1,323)   | <0.001  | 1.0% (10/1,003)             | 11.2% (142/1,267) | <0.001  |
| Clinical pregnancy rate                          | 53.4% (39/73)   | 26.1% (69/264)  | <0.001  | 60.4% (364/603)             | 38.9% (515/1,323) | <0.001  | 66.9% (671/1,003)           | 58.9% (746/1,267) | <0.001  |
| Singleton                                        | 52.1% (38/73)   | 23.9% (63/264)  | <0.001  | 59.0% (356/603)             | 31.0% (410/1,323) | <0.001  | 65.5% (657/1,003)           | 40.0% (507/1,267) | <0.001  |
| Multiple                                         | 1.4% (1/73)     | 2.3% (6/264)    | 0.636   | 1.3% (8/603)                | 7.9% (105/1,323)  | <0.001  | 1.4% (14/1,003)             | 18.9% (239/1,267) | <0.001  |
| Pregnancy loss rate                              | 25.6% (10/39)   | 39.1% (27/69)   | 0.159   | 19.0% (69/364)              | 29.3% (151/515)   | <0.001  | 17.1% (115/671)             | 24.0% (179/746)   | 0.001   |
| Ectopic pregnancy                                | 2.6% (1/39)     | 1.4% (1/69)     | 0.684   | 0.8% (3/364)                | 2.5% (13/515)     | 0.078   | 0.9% (6/671)                | 2.3% (17/746)     | 0.039   |
| Early miscarriage                                | 23.1% (9/39)    | 34.8% (24/69)   | 0.207   | 13.7% (50/364)              | 22.3% (115/515)   | 0.001   | 12.4% (83/671)              | 16.9% (126/746)   | 0.017   |
| Late miscarriage                                 | 0% (0/39)       | 2.9% (2/69)     | 0.5     | 4.4% (16/364)               | 4.5% (23/515)     | 0.96    | 4.0% (27/671)               | 4.7% (35/746)     | 0.54    |
| Pregnancy complications                          | 12.8% (5/39)    | 24.6% (17/69)   | 0.14    | 36.3% (132/364)             | 30.7% (158/515)   | 0.083   | 32.2% (216/671)             | 30.6% (228/746)   | 0.51    |
| Gestational hypertension rate                    | 0% (0/39)       | 2.9% (2/69)     | 0.5     | 5.8% (21/364)               | 3.5% (18/515)     | 0.11    | 3.7% (25/671)               | 3.4% (25/746)     | 0.703   |
| Gestational diabetes rate                        | 7.7% (3/39)     | 14.5% (10/69)   | 0.305   | 16.8% (61/364)              | 14.4% (74/515)    | 0.334   | 17.1% (115/671)             | 11.3% (84/746)    | 0.001   |
| Preterm birth rate                               | 13.8% (4/29)    | 9.5% (4/42)     | 0.578   | 8.1% (24/295)               | 13.2% (48/364)    | 0.039   | 9.2% (51/556)               | 20.7% (117/564)   | <0.001  |
| Singleton                                        | 13.8% (4/29)    | 10.3% (4/39)    | 0.655   | 7.8% (23/294)               | 7.0% (22/314)     | 0.701   | 8.4% (46/546)               | 9.0% (38/423)     | 0.759   |
| Multiple                                         | -               | 0% (0/3)        | -       | 100% (1/1)                  | 52.0% (26/50)     | 0.992   | 50.0% (5/10)                | 56.0% (79/141)    | 0.711   |
| Low birth weight rate                            | 3.6% (1/28)     | 6.8% (3/44)     | 0.564   | 4.4% (13/294)               | 16.2% (66/408)    | <0.001  | 5.5% (31/560)               | 20.9% (146/699)   | <0.001  |
| Singleton                                        | 3.6% (1/28)     | 7.9% (3/38)     | 0.478   | 4.5% (13/292)               | 5.2% (16/310)     | 0.685   | 3.9% (21/540)               | 5.0% (12/419)     | 0.4     |
| Multiple                                         | -               | 0% (0/6)        | -       | 0% (0/2)                    | 51.0% (50/98)     | 0.5     | 50.0% (10/20)               | 44.6% (125/280)   | 0.642   |
| Neonatal malformation cycle rate                 | 0% (0/29)       | 0% (0/42)       | -       | 1.4% (4/295)                | 1.4% (5/364)      | 0.984   | 0.9% (5/556)                | 2.3% (13/567)     | 0.063   |
| <b>Cumulative number of transfer cycles</b>      | 79              | 281             |         | 691                         | 1,576             |         | 1,281                       | 1,775             |         |
| Cumulative number of newborns                    | 31              | 49              |         | 330                         | 477               |         | 705                         | 935               |         |
| Cumulative live birth rate <sup>a</sup>          | 4.4% (31/710)   | 6.5% (46/710)   | 0.081   | 17.6% (326/1,854)           | 22.5% (418/1,854) | <0.001  | 51.5% (689/1,338)           | 56.7% (758/1,338) | 0.007   |
| Singleton                                        | 4.4% (31/710)   | 6.1% (43/710)   | 0.154   | 17.5% (325/1,854)           | 19.5% (362/1,854) | 0.118   | 50.5% (676/1,338)           | 43.6% (584/1,338) | <0.001  |
| Multiple                                         | 0% (0/710)      | 0.4% (3/710)    | 0.2     | 0.1% (1/1,854)              | 3.0% (56/1,854)   | <0.001  | 1.0% (13/1,338)             | 13.0% (174/1,338) | <0.001  |
| Interval since oocyte retrieved, days            | 373 (337-427)   | 264 (256-304)   | <0.001  | 382 (346-449)               | 261 (254-319)     | <0.001  | 401 (349-483)               | 268 (255-362)     | <0.001  |
| <b>Number of cycles not reached live birth</b>   | 679             | 664             |         | 1,528                       | 1,436             |         | 649                         | 580               |         |
| Oocyte unretrieved cycle rate                    | 22.1% (157/710) | 21.8% (155/710) | 0.898   | 4.4% (81/1,854)             | 4.2% (78/1,854)   | 0.808   | 0% (0/1,338)                | 0% (0/1,338)      | -       |
| No transferable embryo cycle rate <sup>b</sup>   | 67.5% (479/710) | 52.3% (371/710) | <0.001  | 53.8% (998/1,854)           | 23.3% (432/1,854) | <0.001  | 16.8% (225/1,338)           | 3.3% (44/1,338)   | <0.001  |
| With transferable embryo cycle rate <sup>c</sup> | 2.4% (17/710)   | 12.8% (91/710)  | <0.001  | 7.3% (136/1,854)            | 14.3% (266/1,854) | <0.001  | 17.3% (231/1,338)           | 22.9% (306/1,338) | <0.001  |

Notes:  
<sup>a</sup>, twice or more live births under the same oocyte retrieval cycle are counted as one when the cumulative live birth rate is calculated. The numbers of twice live births in the PGT-A group and non-PGT-A group were 0 and 0 for women with AFC<5, 3 and 3 for women with AFC ≥ 5 & Recovered oocyte ≤9, 3 and 3 for women with AFC ≥ 5 & Recovered oocyte >9, respectively;  
<sup>b</sup>, the proportions of abnormal embryos (including chimeras) detected in the PGT-A group of 3 strata were 21.0% (149/710), 30.5% (566/1,854) and 14.1% (189/1,338), respectively;  
<sup>c</sup>, the undetected transferable embryos were included in the PGT-A group;  
Abbreviations: AFC, antral follicle count; CI, confidence interval; Non-PGT-A, not use preimplantation genetic testing for aneuploidy; OR, odds ratio; PGT-A, preimplantation genetic testing for

**Table S5. Specific indication-stratified outcomes of the first and cumulative transplant between PGT-A and non-PGT-A patients.**

|                                                  | RPL             |                 |         | Intrauterine adhesion |                 |         | Endometriosis   |                |         | Severe male factor |                 |         |
|--------------------------------------------------|-----------------|-----------------|---------|-----------------------|-----------------|---------|-----------------|----------------|---------|--------------------|-----------------|---------|
|                                                  | PGT-A           | Non-PGT-A       | P value | PGT-A                 | Non-PGT-A       | P value | PGT-A           | Non-PGT-A      | P value | PGT-A              | Non-PGT-A       | P value |
| <b>Number of oocyte retrieval cycles</b>         | 750             | 750             |         | 528                   | 528             |         | 293             | 293            |         | 489                | 489             |         |
| <b>Number of first transfer cycles</b>           | 466             | 582             |         | 289                   | 393             |         | 97              | 203            |         | 178                | 342             |         |
| Single embryo transfer                           | 99.6% (464/466) | 24.9% (145/582) | <0.001  | 99.7% (288/289)       | 31.0% (122/393) | <0.001  | 99.0% (96/97)   | 20.7% (42/203) | <0.001  | 100% (178/178)     | 20.8% (71/342)  | <0.001  |
| Live birth rate                                  | 51.5% (240/466) | 42.3% (246/582) | 0.003   | 45.3% (131/289)       | 35.6% (140/393) | 0.01    | 42.3% (41/97)   | 35.0% (71/203) | 0.223   | 52.8% (94/178)     | 36.3% (124/342) | <0.001  |
| Singleton                                        | 50.9% (237/466) | 33.7% (196/582) | <0.001  | 44.6% (129/289)       | 29.8% (117/393) | <0.001  | 42.3% (41/97)   | 28.6% (58/203) | 0.018   | 52.8% (94/178)     | 30.7% (105/342) | <0.001  |
| Multiple                                         | 0.6% (3/466)    | 8.6% (50/582)   | <0.001  | 0.7% (2/289)          | 5.9% (23/393)   | <0.001  | 0% (0/97)       | 6.4% (13/203)  | 0.011   | 0% (0/178)         | 5.6% (19/342)   | 0.001   |
| Clinical pregnancy rate                          | 63.5% (296/466) | 55.7% (324/582) | 0.01    | 56.7% (164/289)       | 48.9% (192/393) | 0.041   | 60.8% (59/97)   | 48.3% (98/203) | 0.042   | 64.0% (114/178)    | 45.9% (157/342) | <0.001  |
| Singleton                                        | 61.6% (287/466) | 39.3% (229/582) | <0.001  | 55.0% (159/289)       | 38.2% (150/393) | <0.001  | 58.8% (57/97)   | 36.0% (73/203) | <0.001  | 632.9 (112/178)    | 36.0% (123/342) | <0.001  |
| Multiple                                         | 1.9% (9/466)    | 16.3% (95/582)  | <0.001  | 1.7% (5/289)          | 10.7% (42/393)  | <0.001  | 2.1% (2/97)     | 12.3% (25/203) | 0.004   | 1.1% (2/178)       | 9.9% (34/342)   | <0.001  |
| Pregnancy loss rate                              | 18.9% (56/296)  | 24.1% (78/324)  | 0.12    | 20.1% (33/164)        | 27.1% (52/192)  | 0.126   | 30.5% (18/59)   | 27.6% (27/98)  | 0.692   | 17.5% (20/114)     | 21.0% (33/157)  | 0.477   |
| Ectopic pregnancy                                | 0.3% (1/296)    | 1.9% (6/324)    | 0.113   | 0% (0/164)            | 2.6% (5/192)    | 0.065   | 1.7% (1/59)     | 3.1% (3/98)    | 0.604   | 0.9% (1/114)       | 0% (0/157)      | 0.4     |
| Early miscarriage                                | 14.9% (44/296)  | 16.4% (53/324)  | 0.609   | 16.5% (27/164)        | 19.3% (37/192)  | 0.492   | 22.0% (13/59)   | 20.4% (20/98)  | 0.809   | 11.4% (13/114)     | 17.8% (28/157)  | 0.148   |
| Late miscarriage                                 | 3.7% (11/296)   | 5.6% (18/324)   | 0.282   | 3.7% (6/164)          | 6.2% (12/192)   | 0.271   | 6.8% (4/59)     | 5.1% (5/98)    | 0.662   | 5.3% (6/114)       | 3.2% (5/157)    | 0.397   |
| Pregnancy complications                          | 31.1% (92/296)  | 36.7% (119/324) | 0.139   | 32.9% (54/164)        | 39.6% (76/192)  | 0.194   | 25.4% (15/59)   | 28.6% (28/98)  | 0.669   | 28.1% (32/114)     | 30.6% (48/157)  | 0.656   |
| Gestational hypertension rate                    | 2.0% (6/296)    | 3.7% (12/324)   | 0.221   | 4.3% (7/164)          | 3.1% (6/192)    | 0.568   | 1.7% (1/59)     | 3.1% (3/98)    | 0.604   | 4.4% (5/114)       | 3.2% (5/157)    | 0.606   |
| Gestational diabetes rate                        | 17.2% (51/296)  | 17.0% (55/324)  | 0.933   | 17.1% (28/164)        | 20.8% (40/192)  | 0.369   | 18.6% (11/59)   | 9.2% (9/98)    | 0.085   | 18.4% (21/114)     | 12.1% (19/157)  | 0.15    |
| Preterm birth rate                               | 9.2% (22/240)   | 20.7% (51/246)  | <0.001  | 6.9% (9/131)          | 15.7% (22/140)  | 0.022   | 7.3% (3/41)     | 15.5% (11/71)  | 0.218   | 4.3% (4/94)        | 10.6% (13/123)  | 0.086   |
| Singleton                                        | 8.4% (20/237)   | 8.2% (16/196)   | 0.918   | 6.2% (8/129)          | 6.8% (8/117)    | 0.84    | 7.3% (3/41)     | 10.3% (6/58)   | 0.607   | 4.3% (4/94)        | 7.7% (8/104)    | 0.318   |
| Multiple                                         | 66.7% (2/3)     | 70.0% (35/50)   | 0.903   | 50.0% (1/2)           | 60.9% (14/23)   | 0.765   | -               | 38.5% (5/13)   | -       | -                  | 26.3% (5/19)    | -       |
| Low birth weight rate                            | 4.5% (11/242)   | 21.3% (63/296)  | <0.001  | 7% (9/131)            | 14% (23/162)    | 0.046   | 5.0% (2/40)     | 10.8% (9/83)   | 0.299   | 3.2% (3/93)        | 14.8% (21/142)  | 0.004   |
| Singleton                                        | 3.4% (8/236)    | 5.6% (11/196)   | 0.267   | 4.7% (6/127)          | 4.3% (5/116)    | 0.877   | 5.0% (2/40)     | 3.5% (2/57)    | 0.718   | 3.2% (3/93)        | 5.8% (6/104)    | 0.5     |
| Multiple                                         | 50.0% (3/6)     | 52.0% (52/100)  | 0.924   | 75.0% (3/4)           | 39.1% (18/46)   | 0.197   | -               | 26.9% (7/26)   | -       | -                  | 39.5% (15/38)   | -       |
| Neonatal malformation cycle rate                 | 0.4% (1/240)    | 2.0% (5/246)    | 0.145   | 0% (0/131)            | 3.6% (5/140)    | 0.061   | 2.4% (1/41)     | 2.8% (2/71)    | 0.905   | 1.1% (1/94)        | 1.6% (2/124)    | 0.732   |
| <b>Cumulative number of transfer cycles</b>      | 592             | 774             |         | 364                   | 509             |         | 124             | 253            |         | 212                | 422             |         |
| Cumulative number of newborns                    | 291             | 373             |         | 160                   | 204             |         | 54              | 101            |         | 114                | 179             |         |
| Cumulative live birth rate <sup>a</sup>          | 38.3% (287/750) | 40.8% (306/750) | 0.316   | 29.9% (158/528)       | 32.6% (172/528) | 0.353   | 18.1% (53/293)  | 29.0% (85/293) | 0.002   | 23.1% (113/489)    | 31.7% (155/489) | 0.003   |
| Singleton                                        | 37.9% (284/750) | 32.1% (241/750) | 0.02    | 29.5% (156/528)       | 26.7% (141/528) | 0.305   | 18.1% (53/293)  | 23.5% (69/293) | 0.104   | 22.9% (112/489)    | 27.0% (132/489) | 0.14    |
| Multiple                                         | 0.4% (3/750)    | 8.7% (65/750)   | <0.001  | 0.4% (2/528)          | 5.9% (31/528)   | <0.001  | 0% (0/293)      | 5.5% (16/293)  | <0.001  | 0.2% (1/489)       | 4.7% (23/489)   | <0.001  |
| Interval since oocyte retrieved, days            | 420 (362-492)   | 272 (257-378)   | <0.001  | 424 (377-484)         | 324 (260-375)   | <0.001  | 428 (392-534)   | 260 (252-320)  | <0.001  | 380 (346-488)      | 261 (254-330)   | <0.001  |
| <b>Number of cycles not reached live birth</b>   | 463             | 444             |         | 370                   | 356             |         | 240             | 208            |         | 376                | 334             |         |
| Oocyte unretrieved cycle rate                    | 2.1% (16/750)   | 3.5% (26/750)   | 0.121   | 3.6% (19/528)         | 3.8% (20/528)   | 0.87    | 9.9% (29/293)   | 6.1% (18/293)  | 0.094   | 7.8% (38/489)      | 8.6% (42/489)   | 0.6     |
| No transferable embryo cycle rate <sup>b</sup>   | 26.3% (197/750) | 16.4% (123/750) | <0.001  | 33.3% (176/528)       | 18.2% (96/528)  | <0.001  | 47.1% (138/293) | 22.9% (67/293) | <0.001  | 45.6% (223/489)    | 25.4% (124/489) | <0.001  |
| With transferable embryo cycle rate <sup>c</sup> | 16.5% (124/750) | 22.3% (167/750) | 0.005   | 14.6% (77/528)        | 25.6% (135/528) | <0.001  | 8.2% (24/293)   | 19.8% (58/293) | <0.001  | 7.2% (35/489)      | 12.7% (62/489)  | 0.004   |

Notes:

<sup>a</sup>, twice or more live births under the same oocyte retrieval cycle are counted as one when the cumulative live birth rate is calculated. The numbers of twice live births in the PGT-A group and non-PGT-A group were 1 and 2 for women with RSA, 0 and 1 for women with intrauterine adhesion, 0 and 1 for women with endometriosis, 0 and 1 for couples with severe male factor, respectively;

<sup>b</sup>, the proportions of abnormal embryos (including chimeras) detected in the PGT-A group of 4 strata were 18.3% (137/750), 19.5% (103/528), 27.3% (80/293) and 24.7% (121/489), respectively;

<sup>c</sup>, the undetected transferable embryos were included in the PGT-A group;

Abbreviations: CI, confidence interval; Non-PGT-A, not use preimplantation genetic testing for aneuploidy; OR, odds ratio; PGT-A, preimplantation genetic testing for aneuploidy; RPL, recurrent pregnancy loss.
